# Supplementary material for: Sphingosine-1-Phosphate Receptor 1 Is Involved in Non-Obese Diabetic Mouse Thymocyte Migration Disorders
Source: MDPI journal article supplement (doi:10.3390/ijms19051446), 2018-05-12
Supplement: s1 [file s1]

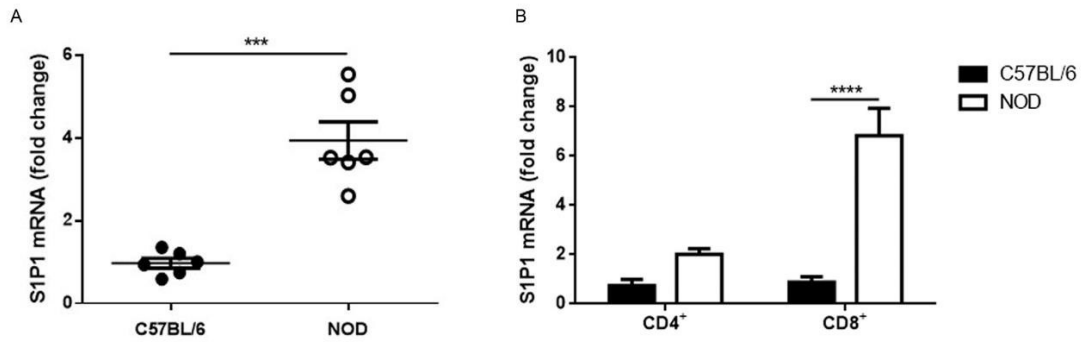

**Figure S1.** NOD thymocytes have increased expression of S1P1 mRNA. (A), the graph shows the mRNA expression of S1P1 in total thymocytes of C57BL/6 (black balls) and NOD (white balls) mice. Panel B depicts the mRNA expression of S1P1 in CD4<sup>+</sup> and CD8<sup>+</sup> SP thymocyte subpopulations in C57BL/6 (black bars) and NOD (white bars) mice. CD4<sup>+</sup> = CD4<sup>+</sup>CD8<sup>-</sup> single-positive; CD8<sup>+</sup> = CD4<sup>-</sup>CD8<sup>+</sup> single-positive. The relative quantitation was performed by the comparative Ct method ( $\Delta\Delta C_t$ ), using C57BL/6 as calibrator (fold change value = 1). Horizontal bars represent the mean  $\pm$  SEM of six biological replicates for total thymocytes (A) and sixteen biological replicates for SP subpopulations (B). Results were analyzed by Student's t test for total thymus and 2 way ANOVA followed by Tukey post-test for sorted thymocyte subsets. Differences were considered statistically significant when \*\*\*  $p < 0.001$ ; \*\*\*\*  $p < 0.0001$ .

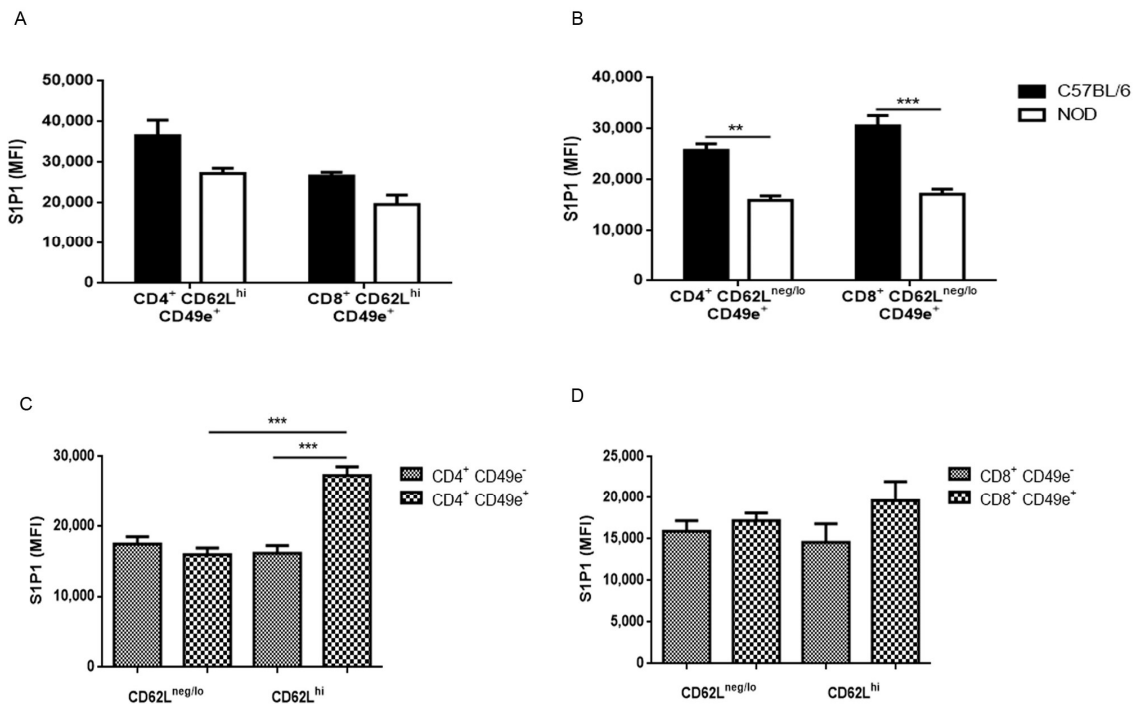

**Figure S2.** NOD CD4<sup>+</sup>CD49e<sup>+</sup> SP cells increase S1P1 expression during differentiation. The panels show S1P1 expression in (A) CD4<sup>+</sup> and CD8<sup>+</sup> SP CD62L<sup>neg/lo</sup>CD49e<sup>-</sup> cells, (B), SP CD4<sup>+</sup> and CD8<sup>+</sup> CD62L<sup>neg/lo</sup>CD49e<sup>+</sup> cells, (C), NOD SP CD4<sup>+</sup>CD62L<sup>neg/lo</sup> or CD4<sup>+</sup>CD62L<sup>hi</sup>, expressing or not CD49e and (D) NOD SP CD8<sup>+</sup>CD62L<sup>neg/lo</sup> or CD8<sup>+</sup>CD62L<sup>hi</sup> thymocytes expressing or not CD49e, as indicated, analyzed by flow cytometry. CD4<sup>+</sup> = CD4<sup>+</sup>CD8<sup>-</sup> single-positive; CD8<sup>+</sup> = CD4<sup>-</sup>CD8<sup>+</sup> single-positive; MFI = median fluorescence intensity. Results are expressed as mean  $\pm$  SEM and were analyzed by 2way ANOVA followed by Tukey post-test or Student's t test. Differences were considered statistically significant when \*\*  $p < 0.01$ ; \*\*\*  $p < 0.001$ ; \*\*\*\*  $p < 0.0001$ , after evaluating 3 C57BL/6 and 4 NOD thymi.

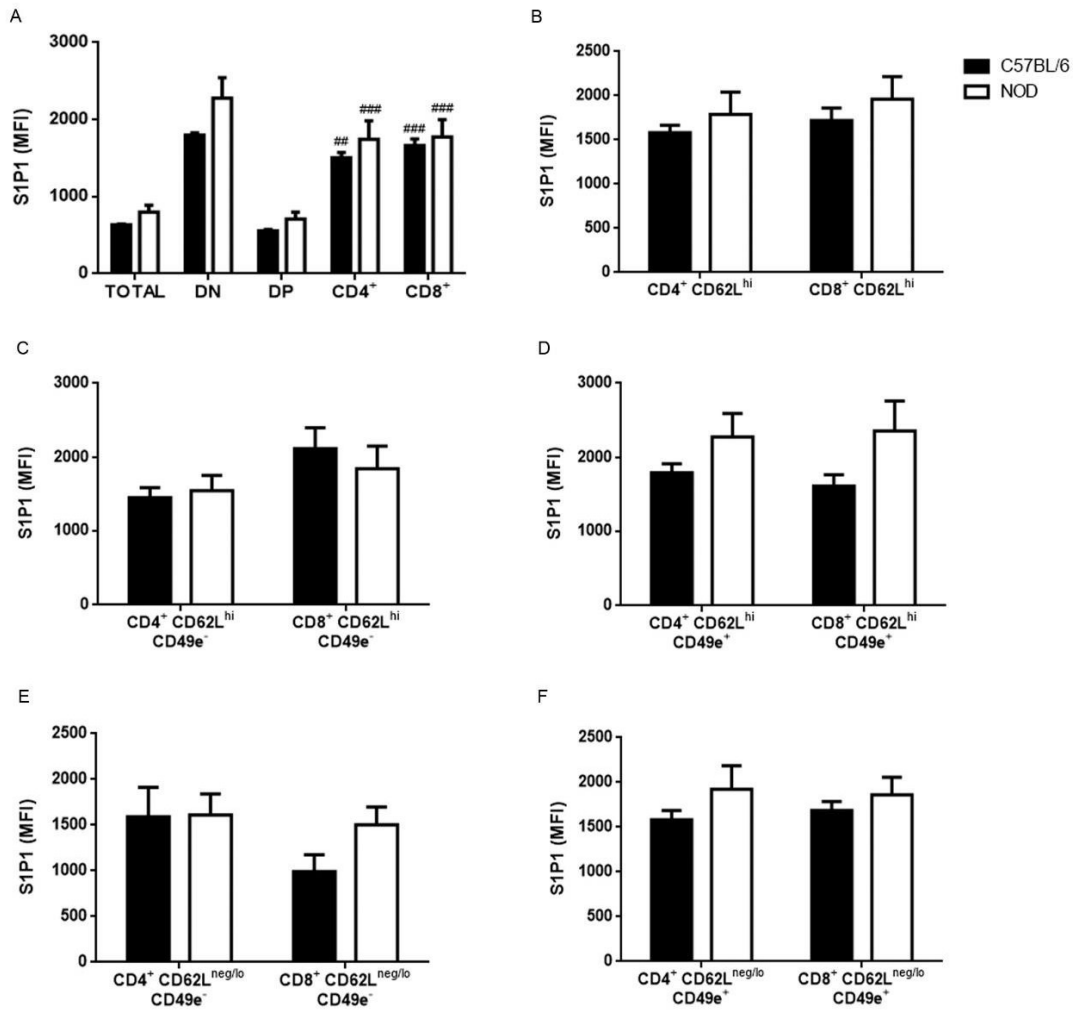

**Figure S3.** Younger NOD mice have no alterations in S1P1 expression. The graphs show S1P1 expression in C57BL/6 (black bars) and NOD (white bars) mice with 4 weeks of age, analyzed by flow cytometry. (A), S1P1 expression on CD4/CD8-defined thymocyte subpopulations, (B), S1P1 expression in CD4<sup>+</sup>CD62L<sup>hi</sup> and CD8<sup>+</sup>CD62L<sup>hi</sup> subpopulations. (C), S1P1 expression in CD4<sup>+</sup>CD62L<sup>hi</sup>CD49e<sup>-</sup> and CD8<sup>+</sup>CD62L<sup>hi</sup>CD49e<sup>-</sup> cells and (D), S1P1 expression in CD4<sup>+</sup>CD62L<sup>hi</sup>CD49e<sup>+</sup> and CD8<sup>+</sup>CD62L<sup>hi</sup>CD49e<sup>+</sup> cells, (E), S1P1 expression in CD4<sup>+</sup>CD62L<sup>neg/lo</sup>CD49e<sup>-</sup> and CD8<sup>+</sup>CD62L<sup>neg/lo</sup>CD49e<sup>-</sup> cells and (F), S1P1 expression in CD4<sup>+</sup>CD62L<sup>neg/lo</sup>CD49e<sup>+</sup> and CD8<sup>+</sup>CD62L<sup>neg/lo</sup>CD49e<sup>+</sup> cells. Total = total thymocytes; DN = CD4<sup>-</sup>CD8<sup>-</sup> double-negative; DP = CD4<sup>+</sup>CD8<sup>+</sup> double-positive; CD4<sup>+</sup> = CD4<sup>+</sup>CD8<sup>-</sup> single-positive; CD8<sup>+</sup> = CD4<sup>-</sup>CD8<sup>+</sup> single-positive; MFI = median fluorescence intensity. Results are expressed as mean ± SEM and were analyzed by 2way ANOVA followed by Tukey post-test. Differences were considered statistically significant when ## *p* < 0.01; ### *p* < 0.001. Hash marks represent statistical significance between DP and SP subpopulations in the same mouse strain, after evaluating 4 C57BL/6 and 4 NOD thymi.

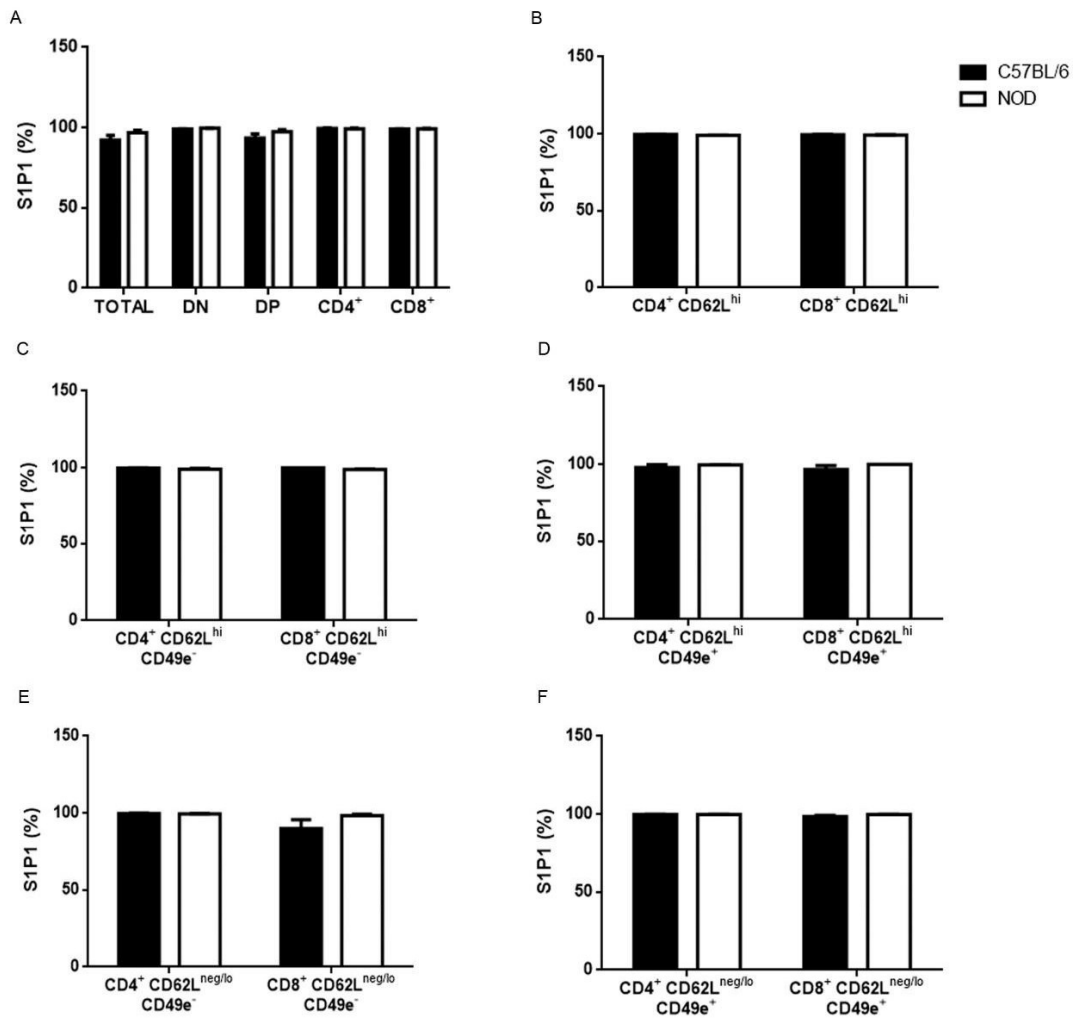

**Figure S4.** Younger NOD mice have no differences in percentage of cells expressing S1P1. The bars show the S1P1 expression on thymocyte subpopulations defined by CD4 and CD8 in C57BL/6 (black bars) and NOD (white bars) mice, analyzed by flow cytometry. (A), S1P1 in total thymocytes, as well as CD4<sup>-</sup>CD8<sup>-</sup> double-negative, CD4<sup>+</sup>CD8<sup>+</sup> double-positive, CD4<sup>+</sup> and CD8<sup>+</sup> SP subpopulations, (B), S1P1 in mature CD4<sup>+</sup>CD62L<sup>hi</sup> and CD8<sup>+</sup>CD62L<sup>hi</sup> SP thymocytes, (C), S1P1 in mature CD4<sup>+</sup>CD62L<sup>hi</sup>CD49e<sup>-</sup> and CD8<sup>+</sup>CD62L<sup>hi</sup>CD49e<sup>-</sup> cells, (D), S1P1 in mature CD4<sup>+</sup>CD62L<sup>hi</sup>CD49e<sup>+</sup> and CD8<sup>+</sup>CD62L<sup>hi</sup>CD49e<sup>+</sup> subpopulations, (E), S1P1 in CD4<sup>+</sup>CD62L<sup>neg/lo</sup>CD49e<sup>-</sup> and CD8<sup>+</sup>CD62L<sup>neg/lo</sup>CD49e<sup>-</sup> cells and (F), S1P1 in CD4<sup>+</sup>CD62L<sup>neg/lo</sup>CD49e<sup>+</sup> and CD8<sup>+</sup>CD62L<sup>neg/lo</sup>CD49e<sup>+</sup> subsets. Total = total thymocytes; DN = CD4<sup>-</sup>CD8<sup>-</sup> double-negative; DP = CD4<sup>+</sup>CD8<sup>+</sup> double-positive; CD4<sup>+</sup> = CD4<sup>+</sup>CD8<sup>-</sup> single-positive; CD8<sup>+</sup> = CD4<sup>-</sup>CD8<sup>+</sup> single-positive; % = relative cell numbers. Results are expressed as mean  $\pm$  SEM and were analyzed by 2way ANOVA followed by Tukey post-test.  $n = 4$  C57BL/6;  $n = 4$  NOD.

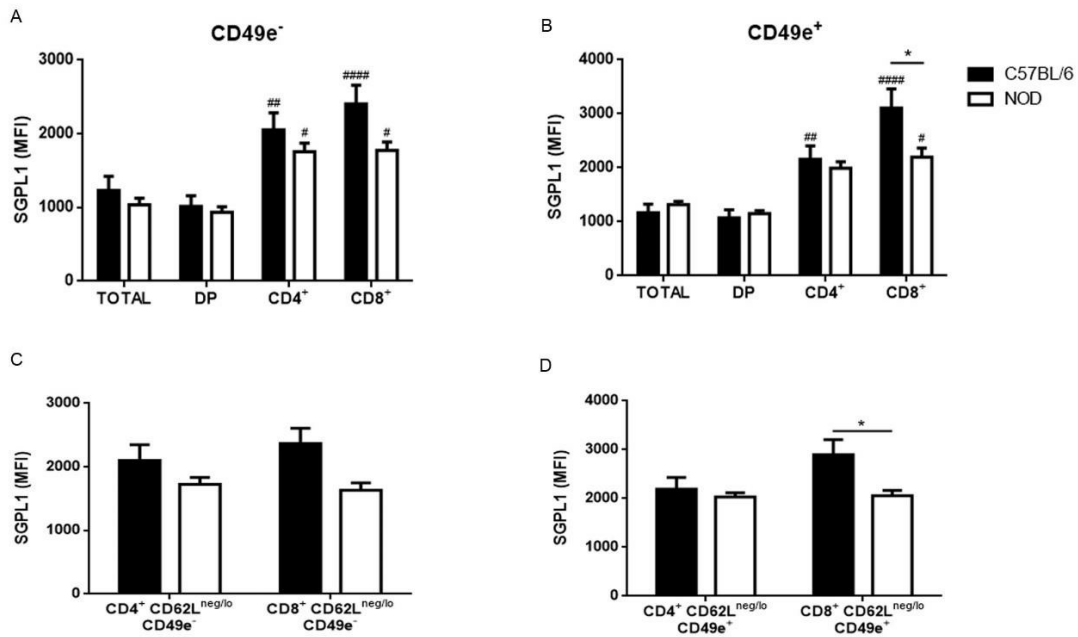

**Figure S5.** NOD CD49e<sup>+</sup> and CD49e<sup>-</sup> SP thymocytes present lesser SGPL1 expression. The bars show the SGPL1 expression on thymocyte subpopulations defined by CD4 and CD8 in C57BL/6 (black bars) and NOD (white bars) mice, analyzed by flow cytometry. (A), CD49e<sup>+</sup> total thymocytes and DP, CD4<sup>+</sup> and CD8<sup>+</sup> SP subpopulations and (B), CD49e<sup>-</sup> total thymocytes and DP, CD4<sup>+</sup> and CD8<sup>+</sup> SP subpopulations, (C), CD4<sup>+</sup> and CD8<sup>+</sup> SP CD62L<sup>neg/lo</sup>CD49e<sup>-</sup> cells and (D), SP CD4<sup>+</sup> and CD8<sup>+</sup> CD62L<sup>neg/lo</sup>CD49e<sup>+</sup> cells. Total = total thymocytes; DN = CD4<sup>-</sup>CD8<sup>-</sup> double-negative; DP = CD4<sup>+</sup>CD8<sup>+</sup> double-positive; CD4<sup>+</sup> = CD4<sup>+</sup>CD8<sup>-</sup> single-positive; CD8<sup>+</sup> = CD4<sup>-</sup>CD8<sup>+</sup> single-positive; MFI = median fluorescence intensity. Results are expressed as mean ± SEM and were analyzed by 2way ANOVA followed by Tukey post-test. Differences were considered statistically significant when \* or #  $p < 0.05$ ; ##  $p < 0.01$ ; ####  $p < 0.0001$ . Asterisks represent statistical significance between C57BL/6 and NOD subpopulations; hash marks represent statistical significance between DP and SP subpopulations in the same mouse strain.  $n = 8$  C57BL/6;  $n = 8$  NOD.

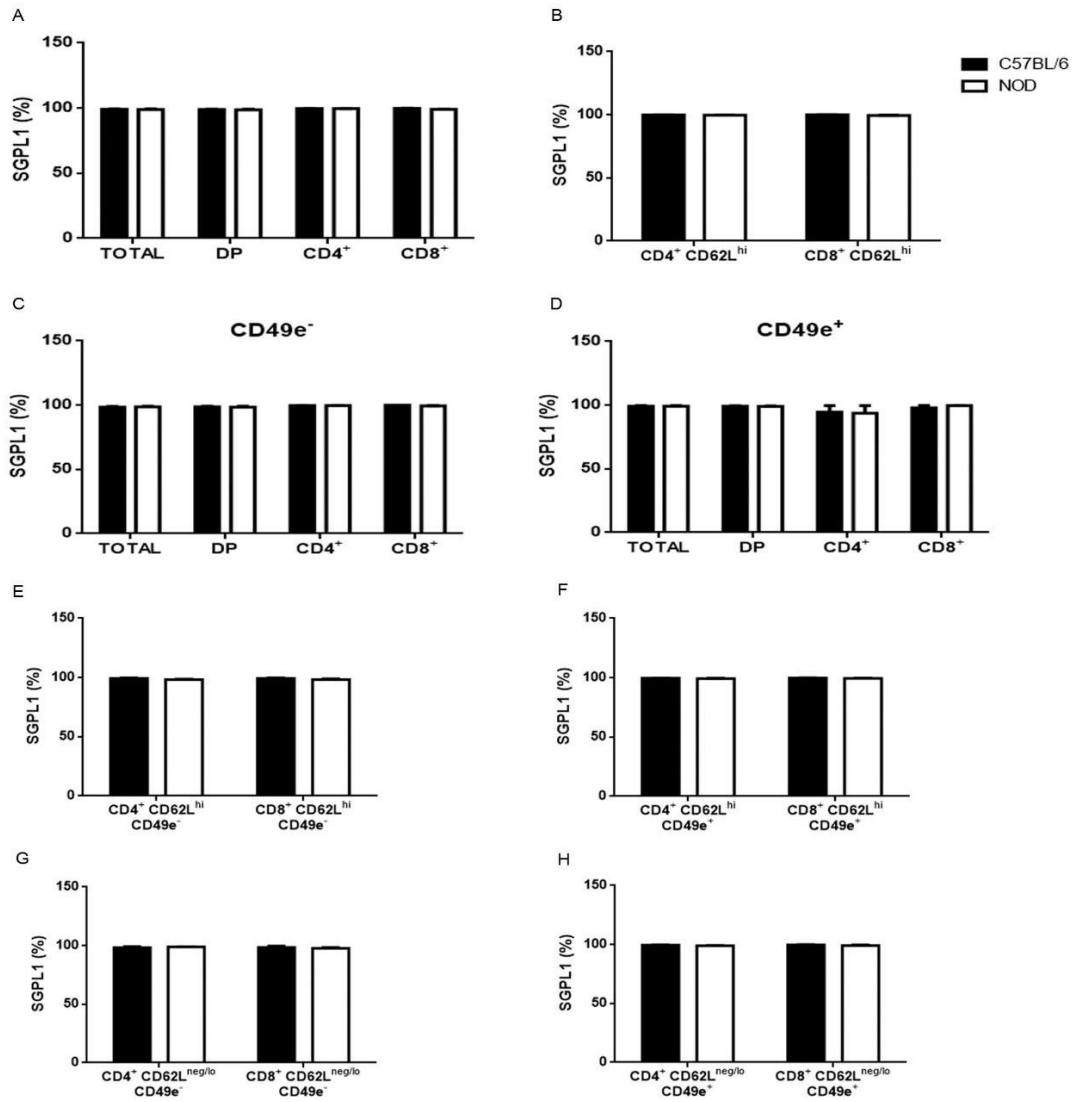

**Figure S6.** NOD mice have similar frequency of cell expressing SGPL1. The bars show the SGPL1 expression on thymocyte subpopulations defined by CD4 and CD8 in C57BL/6 (black bars) and NOD (white bars) mice, analyzed by flow cytometry. (A), SGPL1 in total thymocytes, as well as CD4<sup>+</sup>CD8<sup>+</sup> double-positive, CD4<sup>+</sup> and CD8<sup>+</sup> SP subpopulations, (B), SGPL1 in mature CD4<sup>+</sup>CD62L<sup>hi</sup> and CD8<sup>+</sup>CD62L<sup>hi</sup> SP thymocyte subpopulations, (C), SGPL1 in CD49e<sup>-</sup> total thymocytes and DP, CD4<sup>+</sup> and CD8<sup>+</sup> SP subpopulations, (D), SGPL1 in CD49e<sup>+</sup> total thymocytes and DP, CD4<sup>+</sup> and CD8<sup>+</sup> SP subpopulations, (E), SGPL1 in CD4<sup>+</sup> and CD8<sup>+</sup> SP CD62L<sup>hi</sup>CD49e<sup>-</sup> cells, (F), SGPL1 in SP CD4<sup>+</sup> and CD8<sup>+</sup> CD62L<sup>hi</sup>CD49e<sup>+</sup> cells, (G), SGPL1 in CD4<sup>+</sup> and CD8<sup>+</sup> SP CD62L<sup>neg/lo</sup>CD49e<sup>-</sup> cells and (H), SGPL1 in SP CD4<sup>+</sup> and CD8<sup>+</sup> CD62L<sup>neg/lo</sup>CD49e<sup>+</sup> cells. Total = total thymocytes; DN = CD4<sup>-</sup>CD8<sup>-</sup> double-negative; DP = CD4<sup>+</sup>CD8<sup>+</sup> double-positive; CD4<sup>+</sup> = CD4<sup>+</sup>CD8<sup>-</sup> single-positive; CD8<sup>+</sup> = CD4<sup>-</sup>CD8<sup>+</sup> single-positive; % = relative cell numbers. Results are expressed as mean ± SEM and were analyzed by 2way ANOVA followed by Tukey post-test. *n* = 8 C57BL/6; *n* = 8 NOD.

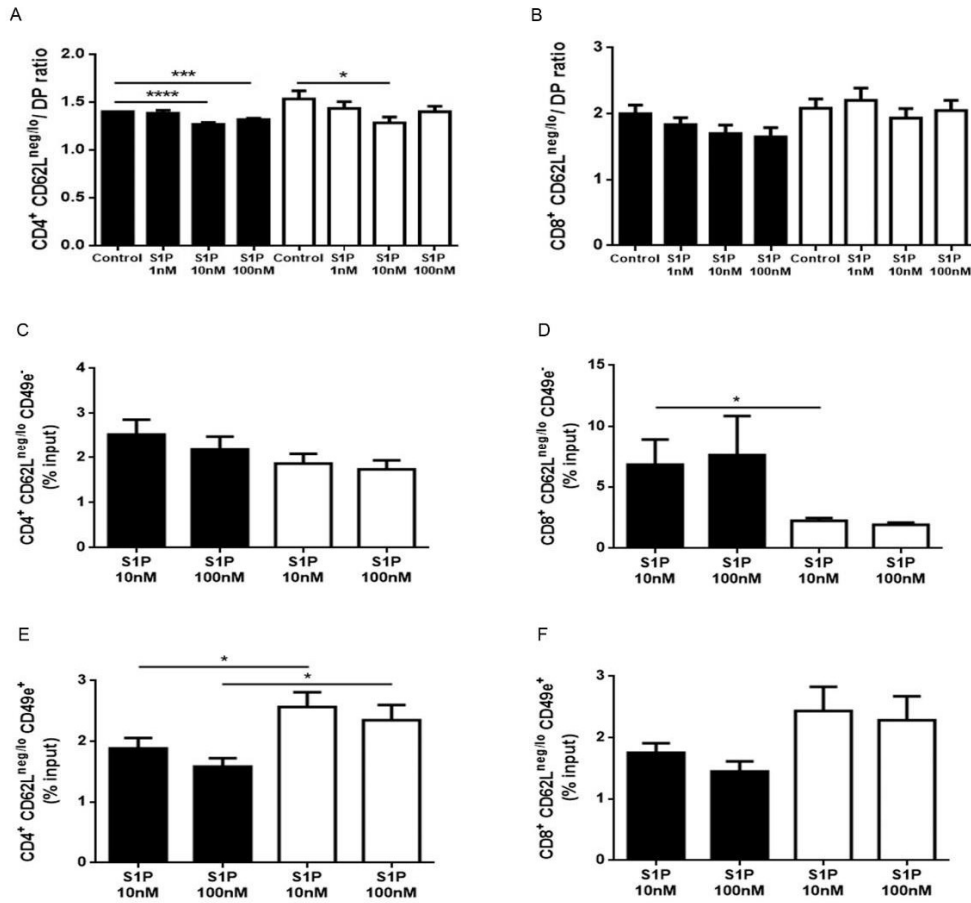

**Figure S7.** CD62L<sup>neg/lo</sup> thymocyte subpopulations have no chemotactic response under S1P stimulation. The panels show (A), SP CD4<sup>+</sup>CD62L<sup>neg/lo</sup>, (B), SP CD8<sup>+</sup>CD62L<sup>neg/lo</sup>, (C), CD4<sup>+</sup>CD62L<sup>neg/lo</sup>CD49e<sup>-</sup>, (D), CD8<sup>+</sup>CD62L<sup>neg/lo</sup>CD49e<sup>-</sup>, (E), CD4<sup>+</sup>CD62L<sup>neg/lo</sup>CD49e<sup>+</sup> and (F), CD8<sup>+</sup>CD62L<sup>neg/lo</sup>CD49e<sup>+</sup> cells migration towards 1 nM, 10 nM or 100 nM of S1P, in C57BL/6 (black bars) and NOD (white bars) mice. CD4<sup>+</sup> = CD4<sup>+</sup>CD8<sup>-</sup> single-positive; CD8<sup>+</sup> = CD4<sup>-</sup>CD8<sup>+</sup> single-positive; MFI = median fluorescence intensity. Results are shown as the ratio of the percentages of input (single-positive to double-positive thymocytes) or percentages of input, and are expressed as mean ± SEM, being analyzed by 2way ANOVA followed by Tukey post-test or Student's t test. Differences were considered statistically significant when \*  $p < 0.05$ ; \*\*\*  $p < 0.001$ ; \*\*\*\*  $p < 0.0001$ , after evaluating 6 C57BL/6 versus 6 NOD animals.

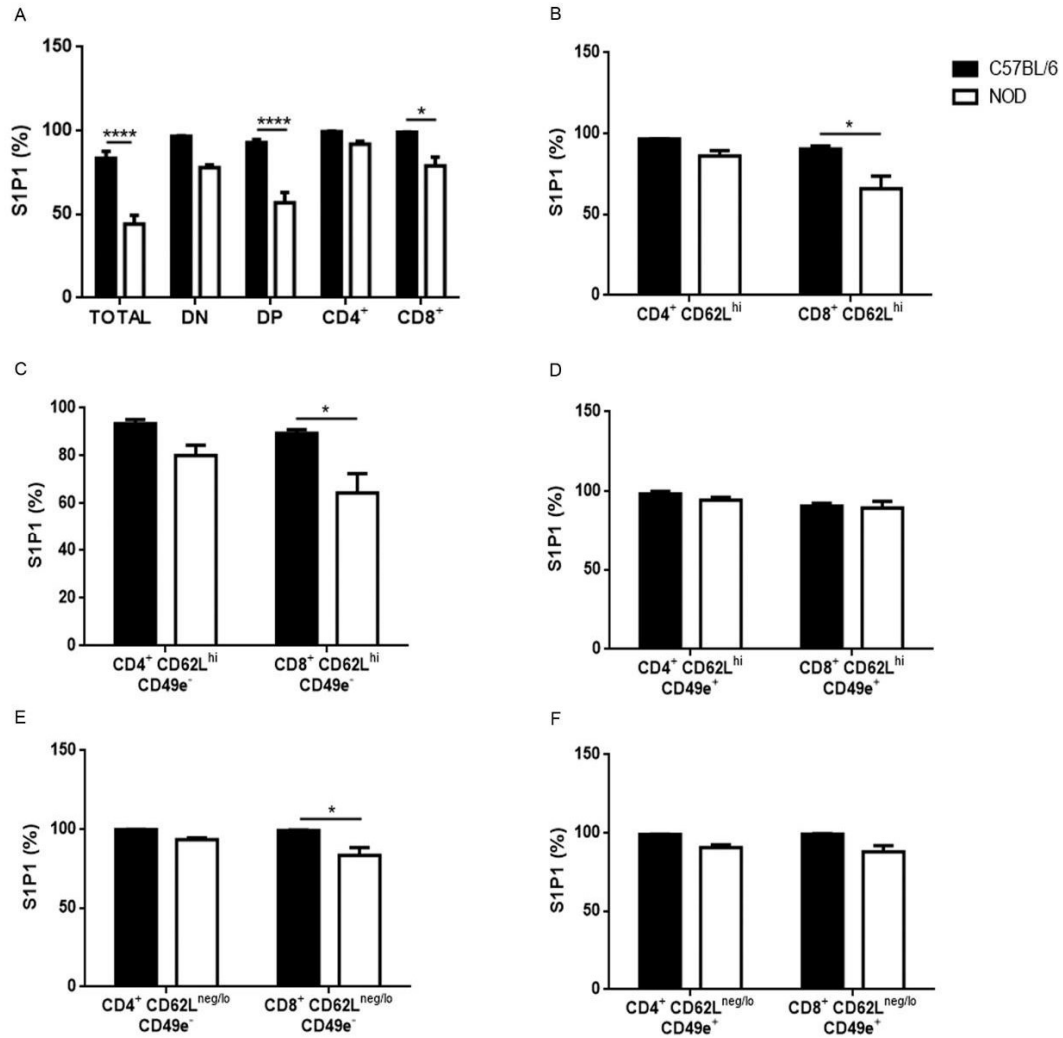

**Figure S8.** NOD mice have decreased percentage of CD8<sup>+</sup>CD49<sup>-</sup> cells expressing S1P1. The graphs show the S1P1 expression on thymocyte subpopulations defined by CD4 and CD8 in C57BL/6 (black bars) and NOD (white bars) mice, analyzed by flow cytometry. (A), S1P1 in total thymocytes, as well as CD4<sup>-</sup>CD8<sup>-</sup> double-negative, CD4<sup>+</sup>CD8<sup>+</sup> double-positive, CD4<sup>+</sup> and CD8<sup>+</sup> SP subpopulations, (B), S1P1 in mature CD4<sup>+</sup>CD62L<sup>hi</sup> and CD8<sup>+</sup>CD62L<sup>hi</sup> SP thymocyte subpopulations, (C), S1P1 in mature CD4<sup>+</sup>CD62L<sup>hi</sup>CD49e<sup>-</sup> and CD8<sup>+</sup>CD62L<sup>hi</sup>CD49e<sup>-</sup> cells, (D), S1P1 in mature CD4<sup>+</sup>CD62L<sup>hi</sup>CD49e<sup>+</sup> and CD8<sup>+</sup>CD62L<sup>hi</sup>CD49e<sup>+</sup> subpopulations, (E), S1P1 in CD4<sup>+</sup>CD62L<sup>neg/lo</sup>CD49e<sup>-</sup> and CD8<sup>+</sup>CD62L<sup>neg/lo</sup>CD49e<sup>-</sup> cells and (F), S1P1 in CD4<sup>+</sup>CD62L<sup>neg/lo</sup>CD49e<sup>+</sup> and CD8<sup>+</sup>CD62L<sup>neg/lo</sup>CD49e<sup>+</sup> subsets. Total = total thymocytes; DN = CD4<sup>-</sup>CD8<sup>-</sup> double-negative; DP = CD4<sup>+</sup>CD8<sup>+</sup> double-positive; CD4<sup>+</sup> = CD4<sup>+</sup>CD8<sup>-</sup> single-positive; CD8<sup>+</sup> = CD4<sup>-</sup>CD8<sup>+</sup> single-positive; % = relative cell numbers. Results are expressed as mean ± SEM and were analyzed by 2way ANOVA followed by Tukey post-test. Differences were considered statistically significant when \*  $p < 0.05$ ; \*\*\*\*  $p < 0.0001$ .  $n = 3$  C57BL/6;  $n = 4$  NOD.

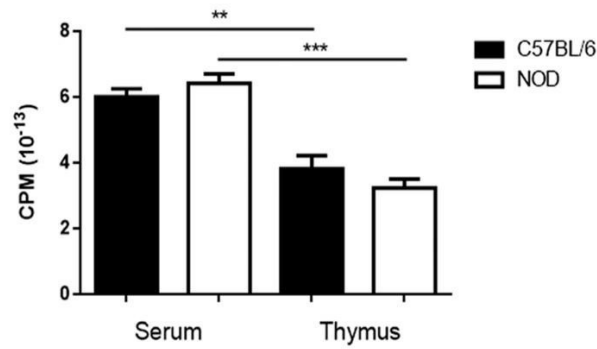

**Figure S9.** NOD mice have normal S1P gradient between thymus and serum. S1P was measured in thymi and sera of C57BL/6 (black bars) and NOD (white bars) by thin-layer chromatography (TLC). Four C57BL/6 and 4 NOD mice were used for these experiments. Results are expressed as mean  $\pm$  SEM and were analyzed by 2 way ANOVA followed by Tukey post-test. Differences were considered statistically significant when \*\*  $p < 0.01$ ; \*\*\*  $p < 0.001$ . CPM = counts per minute.

**Table S1.** Primers and standard curve parameters for gene amplification in thymi from C57BL/6 and NOD mice.

| Mouse gene target | Primer sequences (5'-3')     | Slope | Intercept | Coefficient of linearity ( $r^2$ ) | Amplification efficiency (%) |
|-------------------|------------------------------|-------|-----------|------------------------------------|------------------------------|
| <b>S1P1</b>       | FW - GTGTAGACCCAGAGTCCTGCG   | -3,06 | 15,9      | 0,99                               | 112,4                        |
|                   | RV - AGCTTTTCCTTGGCTGGAGAG   |       |           |                                    |                              |
| <b>HPRT</b>       | FW - TCCCAGCGTCGTGATTAGCGATG | -2,89 | 13,96     | 0,98                               | 121,8                        |
|                   | RV - GGCCACAATGTGATGGCCTCCC  |       |           |                                    |                              |
| <b>GAPDH</b>      | FW - CCACTCACGGCAAATTCAACGGC | -3,16 | 9,62      | 0,98                               | 107,2                        |
|                   | RV - CCACCCTTCAAGTGGCCCCG    |       |           |                                    |                              |
